# Supplementary material for: Leads and lags between Antarctic temperature and carbon dioxide during the last deglaciation
Source: Copernicus journal article supplement (doi:10.5194/cp-2017-71), 2017-05-30
Supplement: Supplementary file 1 [file cp-2017-71-supplement.pdf]

# Supplement to: Leads and lags between Antarctic temperature and carbon dioxide during the last deglaciation

by Léa Gest, Frédéric Parrenin, Jai Chowdhry Beeman, Dominique Raynaud, Tyler J. Fudge, Christo Buizert, Edward J. Brook.

| ATS2 | Time WD2014  | Temperature °C |
|------|--------------|----------------|
|      | <i>6540</i>  | <i>0,5</i>     |
|      | <i>11590</i> | <i>0,74</i>    |
|      | 11840        | -0,8           |
|      | <b>12801</b> | <b>-2,8</b>    |
|      | <b>14450</b> | <b>-1,7</b>    |
|      | 14730        | -2,9           |
|      | 15840        | -3,5           |
|      | 16190        | -3,8           |
|      | <i>17680</i> | <i>-7,7</i>    |
|      | <i>23000</i> | <i>-8,7</i>    |

  

| CO2 | Time WD2014  | CO2 concentration (ppmv) |
|-----|--------------|--------------------------|
|     | <i>8923</i>  | <i>270</i>               |
|     | <i>11353</i> | <i>272</i>               |
|     | 11565        | 261                      |
|     | <b>12953</b> | <b>240,6</b>             |
|     | <b>14413</b> | <b>245</b>               |
|     | 14639        | 233                      |
|     | 16087        | 227                      |
|     | 16142        | 218                      |
|     | <i>17654</i> | <i>193</i>               |
|     | <i>22909</i> | <i>195</i>               |

Table S1: Values of our initial determined fits. Bold type values are the 6 points linera fit, italic type for the 4 points linear fit.

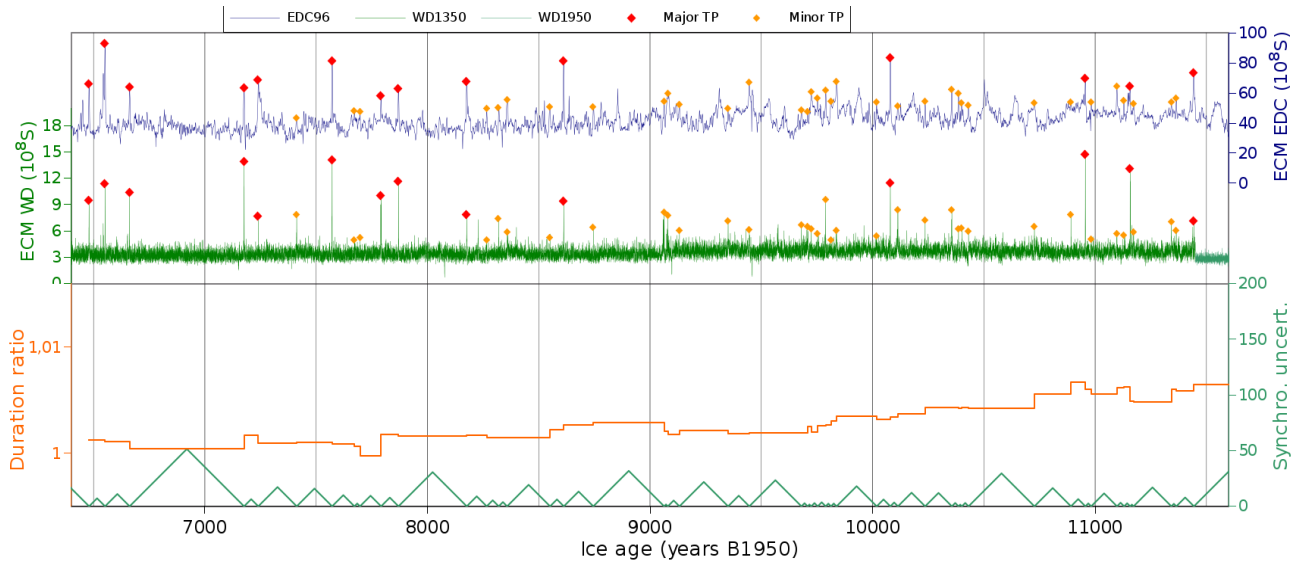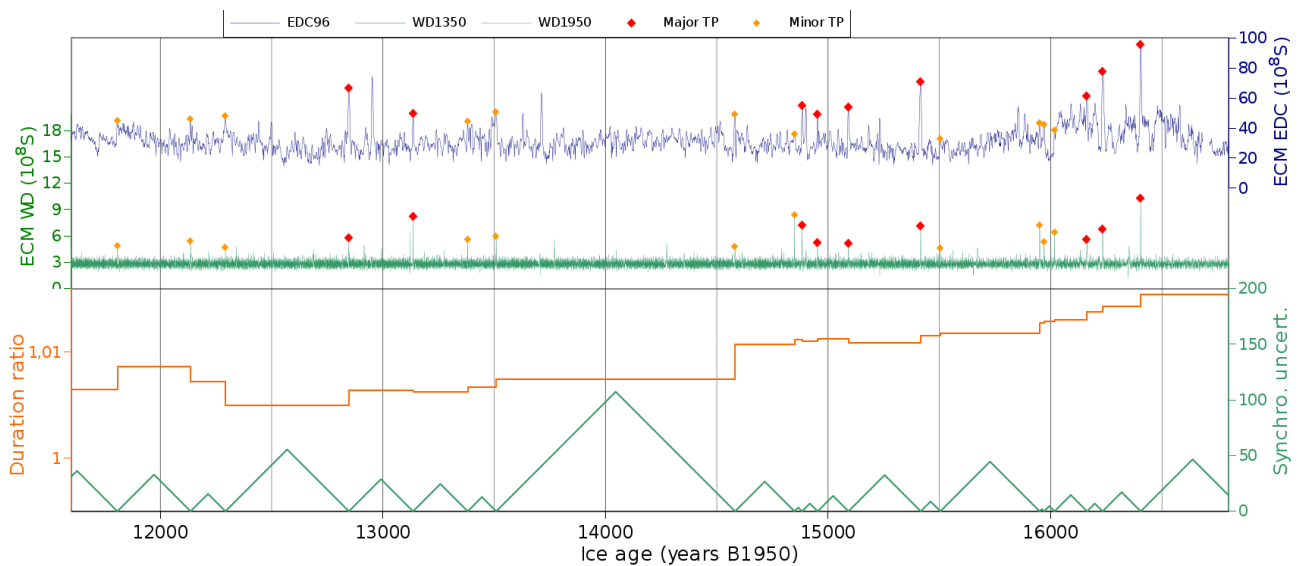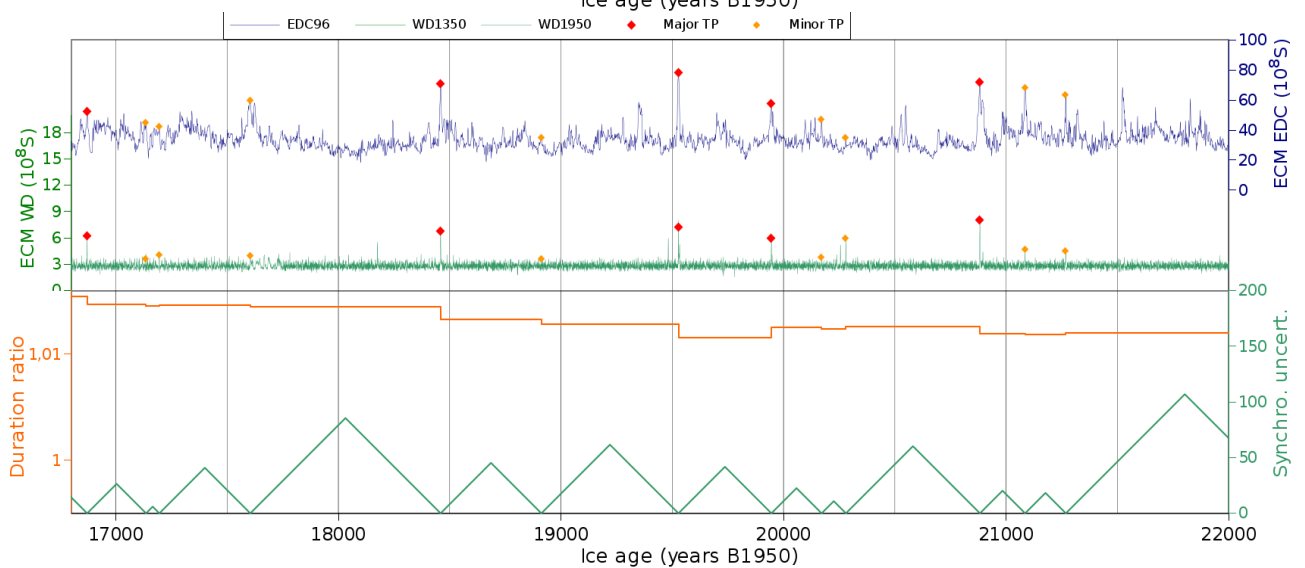

**Volcanic synchronisation between the EDC and WD ice cores. For each panel: (Top) ECM records from EDC (blue) and WD (raw data: 6.4-11.4 ka; adjusted data: 11.4-24 ka). Red diamonds are major tie points, while orange diamonds are minor tie points. (Bottom) Ratio of the age difference between two tie points (orange) and uncertainty in the synchronisation (green) determined as 20% of the distance to the nearest tie point.**
